# Supplementary material for: Chenodeoxycholic Acid Improves Embryo Implantation and Metabolic Health through Modulating Gut Microbiota–Host Metabolites Interaction during Early Pregnancy
Source: MDPI journal article supplement (doi:10.3390/antiox13010008), 2023-12-19
Supplement: s1 [file s1]

**Table S1.** Ingredients and nutrient compositions of basal diets for sows (as-fed basis).

| Items                         | Estrus Phase | Pregnancy Phase |
|-------------------------------|--------------|-----------------|
| Ingredients, %                |              |                 |
| Corn                          | 62.39        | 68.90           |
| Soybean meal                  | 18.50        | 14.50           |
| Wheat bran                    | 4.65         | 14.00           |
| Fish meal                     | 3.00         | -               |
| Extruded soybean              | 6.70         | -               |
| Monocalcium phosphate         | 0.95         | 0.40            |
| Limestone                     | 1.15         | 1.30            |
| Soybean oil                   | 1.00         | -               |
| Salt                          | 0.30         | 0.40            |
| Sodium bicarbonate            | 0.10         | -               |
| Sodium sulfate                | 0.10         | -               |
| Magnesium sulfate             | 0.20         | -               |
| Potassium chloride            | 0.15         | -               |
| L-Lysine·HCl                  | 0.35         | 0.22            |
| L-Threonine                   | 0.05         | 0.04            |
| Choline chloride (60%)        | 0.10         | -               |
| Phytase                       | -            | 0.02            |
| Vitamin-mineral premix        | 0.31         | 0.23            |
| Analyzed nutrient composition |              |                 |
| Total energy, MJ/kg           | 16.31        | 15.88           |
| Crude protein, %              | 15.94        | 13.12           |
| Amino acid composition, %     |              |                 |
| Lysine                        | 1.00         | 0.67            |
| Methionine                    | 0.37         | 0.22            |
| Threonine                     | 0.59         | 0.41            |
| Tryptophan                    | 0.18         | 0.15            |
| Valine                        | 0.70         | 0.53            |
| Leucine                       | 1.19         | 0.92            |
| Isoleucine                    | 0.55         | 0.38            |

|                              |       |       |
|------------------------------|-------|-------|
| Arginine                     | 0.90  | 0.68  |
| Histidine                    | 0.38  | 0.29  |
| Phenylalanine                | 0.75  | 0.58  |
| Alanine                      | 0.79  | 0.62  |
| Aspartate                    | 1.32  | 0.79  |
| Cysteine                     | 0.33  | 0.21  |
| Glutamate                    | 2.48  | 1.72  |
| Glycine                      | 0.66  | 0.49  |
| Proline                      | 0.85  | 0.70  |
| Serine                       | 0.68  | 0.47  |
| Tyrosine                     | 0.50  | 0.30  |
| Fatty acid composition, mg/g |       |       |
| C8:0                         | 0.01  | 0.01  |
| C10:0                        | 0.02  | 0.02  |
| C12:0                        | 0.01  | 0.01  |
| C14:0                        | 0.12  | 0.02  |
| C15:0                        | 0.02  | 0.01  |
| C16:0                        | 6.13  | 4.16  |
| C16:1                        | 0.15  | 0.04  |
| C17:0                        | 0.07  | 0.03  |
| C18:0                        | 1.38  | 0.57  |
| C18:1n9c                     | 10.25 | 6.33  |
| C18:2n6c                     | 21.81 | 13.81 |
| C18:3n3                      | 1.64  | 0.57  |
| C20:0                        | 0.19  | 0.11  |
| C20:1                        | 0.13  | 0.11  |
| C21:0                        | 0.04  | 0.02  |
| C20:4n6                      | 0.03  | 0.02  |
| C22:0                        | 0.15  | 0.07  |
| C20:5n3                      | 0.22  | 0.02  |
| C22:2                        | 0.04  | 0.02  |
| C23:0                        | 0.03  | 0.02  |

|         |      |      |
|---------|------|------|
| C24:0   | 0.15 | 0.10 |
| C24:1   | 0.03 | 0.00 |
| C22:6n3 | 0.35 | 0.00 |

**Table S2.** Differential metabolites in feces of sows.

| Metabolite                                                          | HMDB Superclass                 | HMDB Class                          | VIP score | Levels |
|---------------------------------------------------------------------|---------------------------------|-------------------------------------|-----------|--------|
| Ecgonine                                                            | Alkaloids and derivatives       | Tropane alkaloids                   | 1.27      | Up     |
| Homosalate                                                          | Benzenoids                      | Benzene and substituted derivatives | 2.25      | Up     |
| Silux                                                               | Benzenoids                      | Benzene and substituted derivatives | 1.41      | Up     |
| Tridec-8-enedioylcarnitine                                          | Lipids and lipid-like molecules | Fatty Acyls                         | 2.87      | Up     |
| Sphingosine 1-phosphate (d19:1-P)                                   | Lipids and lipid-like molecules | Sphingolipids                       | 2.46      | Up     |
| Phorbol-12,13-dibutyrate                                            | Lipids and lipid-like molecules | Prenol lipids                       | 2.07      | Up     |
| LysoPC(18:2(9Z,12Z)/0:0)                                            | Lipids and lipid-like molecules | Glycerophospholipids                | 1.93      | Up     |
| Cholic Acid                                                         | Lipids and lipid-like molecules | Steroids and steroid derivatives    | 1.79      | Up     |
| Antroquinonol                                                       | Lipids and lipid-like molecules | Prenol lipids                       | 1.64      | Up     |
| 2-Aminobenzylstatine                                                | Organic acids and derivatives   | Carboxylic acids and derivatives    | 2.69      | Up     |
| N-Undecanoylglycine                                                 | Organic acids and derivatives   | Carboxylic acids and derivatives    | 1.48      | Up     |
| Arg-Thr-Lys-Arg                                                     | Organic acids and derivatives   | Carboxylic acids and derivatives    | 1.18      | Up     |
| N-Acetyllactosamine                                                 | Organic oxygen compounds        | Organooxygen compounds              | 3.41      | Up     |
| [3-(2-Aminopropyl)-6-methylidenecyclohexa-1,3-dien-1-yl]methanediol | Organic oxygen compounds        | Organooxygen compounds              | 1.36      | Up     |
| Mepindolol                                                          | Organoheterocyclic compounds    | Indoles and derivatives             | 2.58      | Up     |
| Pindolol                                                            | Organoheterocyclic compounds    | Indoles and derivatives             | 2.29      | Up     |
| Ethoxyquin                                                          | Organoheterocyclic compounds    | Quinolines and derivatives          | 1.84      | Up     |
| 1,5-Isoquinolinediol                                                | Organoheterocyclic compounds    | Isoquinolines and derivatives       | 1.57      | Up     |
| 1-Hydroxyisoquinoline                                               | Organoheterocyclic compounds    | Isoquinolines and derivatives       | 1.58      | Up     |

|                                                                 |                                 |                                     |      |      |
|-----------------------------------------------------------------|---------------------------------|-------------------------------------|------|------|
| Pregnan-20-one, 17-(acetyloxy)-3-hydroxy-6-methyl-, (3a,5b,6a)- | -                               | -                                   | 1.80 | Up   |
| N-Linoleoyl Histidine                                           | -                               | -                                   | 1.39 | Up   |
| 2-Hydroxyquinoline                                              | -                               | -                                   | 1.08 | Up   |
| Riddelliine                                                     | Alkaloids and derivatives       | -                                   | 1.52 | Down |
| Cytochalasin B                                                  | Alkaloids and derivatives       | Cytochalasans                       | 2.02 | Down |
| N',N'-Diphenylhydrazinecarbohydrazide                           | Benzenoids                      | Benzene and substituted derivatives | 1.11 | Down |
| 3-Hydroxybenzoic Acid                                           | Benzenoids                      | Benzene and substituted derivatives | 1.06 | Down |
| 4-Hydroxy-5-phenyltetrahydro-1,3-oxazin-2-one                   | Benzenoids                      | Benzene and substituted derivatives | 1.15 | Down |
| Hydroxy Tyrosol -Acetate                                        | Benzenoids                      | Benzene and substituted derivatives | 1.28 | Down |
| 1,2-Dihydroxy-3,4-epoxy-1,2,3,4-tetrahydronaphthalene           | Benzenoids                      | Tetralins                           | 1.29 | Down |
| Ketoprofen                                                      | Benzenoids                      | Benzene and substituted derivatives | 1.12 | Down |
| Cyclopentolate                                                  | Benzenoids                      | Benzene and substituted derivatives | 1.59 | Down |
| Desmethyl Fluvoxamine                                           | Benzenoids                      | Benzene and substituted derivatives | 1.47 | Down |
| Gingerol                                                        | Benzenoids                      | Phenols                             | 1.85 | Down |
| Isoproterenol                                                   | Benzenoids                      | Phenols                             | 2.24 | Down |
| Pimelic Acid                                                    | Lipids and lipid-like molecules | Fatty Acyls                         | 1.15 | Down |
| 12S-HHT                                                         | Lipids and lipid-like molecules | Fatty Acyls                         | 1.11 | Down |
| Demethylphylloquinone                                           | Lipids and lipid-like molecules | Prenol lipids                       | 1.03 | Down |
| (2E,4E)-Hexa-2,4-dienedioylcarnitine                            | Lipids and lipid-like molecules | Fatty Acyls                         | 1.11 | Down |
| Cis-4-Decenedioic acid                                          | Lipids and lipid-like molecules | Fatty Acyls                         | 1.09 | Down |
| (+)-cis-abscisic aldehyde                                       | Lipids and lipid-like molecules | Prenol lipids                       | 1.04 | Down |
| (17R)-17-Hydroxy-13-methyl-17-prop-2-enyl-1,2,6,7,8,14,15,16-   | Lipids and lipid-like molecules | Steroids and steroid derivatives    | 1.10 | Down |

|                                           |                                 |                                  |      |      |  |
|-------------------------------------------|---------------------------------|----------------------------------|------|------|--|
| <hr/>                                     |                                 |                                  |      |      |  |
| octahydrocyclopenta[a]phenanthren-3-one   |                                 |                                  |      |      |  |
| Estriol                                   | Lipids and lipid-like molecules | Steroids and steroid derivatives | 1.16 | Down |  |
| 5-Acetamidovalerate                       | Lipids and lipid-like molecules | Fatty Acyls                      | 1.19 | Down |  |
| Pantothenol                               | Lipids and lipid-like molecules | Fatty Acyls                      | 1.04 | Down |  |
| Doisynoestrol                             | Lipids and lipid-like molecules | Steroids and steroid derivatives | 1.04 | Down |  |
| Glycerylphosphorylcholine                 | Lipids and lipid-like molecules | Glycerophospholipids             | 1.11 | Down |  |
| 3-Hydroxy-cis-5-octenoylcarnitine         | Lipids and lipid-like molecules | Fatty Acyls                      | 1.09 | Down |  |
| Oxymesterone                              | Lipids and lipid-like molecules | Steroids and steroid derivatives | 1.05 | Down |  |
| 28-Homobrassinolide                       | Lipids and lipid-like molecules | Steroids and steroid derivatives | 1.22 | Down |  |
| Genipin                                   | Lipids and lipid-like molecules | Prenol lipids                    | 1.18 | Down |  |
| Prostaglandin I2                          | Lipids and lipid-like molecules | Fatty Acyls                      | 1.38 | Down |  |
| Ethyl (S)-3-hydroxybutyrate glucoside     | Lipids and lipid-like molecules | Fatty Acyls                      | 1.24 | Down |  |
| Prednisone acetate                        | Lipids and lipid-like molecules | Steroids and steroid derivatives | 1.37 | Down |  |
| 5-Hydroxyvalproic acid                    | Lipids and lipid-like molecules | Fatty Acyls                      | 1.16 | Down |  |
| Glycerophosphocholine                     | Lipids and lipid-like molecules | Glycerophospholipids             | 1.33 | Down |  |
| Hexadecanedioic acid                      | Lipids and lipid-like molecules | Fatty Acyls                      | 1.45 | Down |  |
| (5S,6R)-Methyl 5,6,7-trihydroxyheptanoate | Lipids and lipid-like molecules | Fatty Acyls                      | 1.36 | Down |  |
| Butyl (S)-3-hydroxybutyrate glucoside     | Lipids and lipid-like molecules | Fatty Acyls                      | 1.60 | Down |  |
| 4-Deacetylneosalaniol                     | Lipids and lipid-like molecules | Prenol lipids                    | 1.32 | Down |  |
| Octa-3,6-dienedioylcarnitine              | Lipids and lipid-like molecules | Fatty Acyls                      | 1.53 | Down |  |
| Artecanin                                 | Lipids and lipid-like molecules | Prenol lipids                    | 1.31 | Down |  |
| Goshuyic acid                             | Lipids and lipid-like molecules | Fatty Acyls                      | 1.58 | Down |  |
| <hr/>                                     |                                 |                                  |      |      |  |

|                                                   |                                         |                                  |      |      |
|---------------------------------------------------|-----------------------------------------|----------------------------------|------|------|
| Delta-Tocopherol                                  | Lipids and lipid-like molecules         | Prenol lipids                    | 1.49 | Down |
| Aldosterone                                       | Lipids and lipid-like molecules         | Steroids and steroid derivatives | 1.52 | Down |
| Jacarandic acid                                   | Lipids and lipid-like molecules         | Prenol lipids                    | 1.32 | Down |
| 21-Deoxycortisol                                  | Lipids and lipid-like molecules         | Steroids and steroid derivatives | 1.60 | Down |
| 4alpha-carboxy-5alpha-cholesta-8,24-dien-3beta-ol | Lipids and lipid-like molecules         | Steroids and steroid derivatives | 1.18 | Down |
| Prostaglandin J2                                  | Lipids and lipid-like molecules         | Fatty Acyls                      | 1.57 | Down |
| Ingenol                                           | Lipids and lipid-like molecules         | Prenol lipids                    | 1.65 | Down |
| 2-Ethyl-2-hydroxybutanedioylcarnitine             | Lipids and lipid-like molecules         | Fatty Acyls                      | 1.36 | Down |
| Prostaglandin A2                                  | Lipids and lipid-like molecules         | Fatty Acyls                      | 1.69 | Down |
| 21-Deoxycortisone                                 | Lipids and lipid-like molecules         | Steroids and steroid derivatives | 1.66 | Down |
| Heptanoic acid                                    | Lipids and lipid-like molecules         | Fatty Acyls                      | 1.57 | Down |
| Isopropylmaleic acid                              | Lipids and lipid-like molecules         | Fatty Acyls                      | 1.63 | Down |
| Demissidine                                       | Lipids and lipid-like molecules         | Steroids and steroid derivatives | 1.99 | Down |
| 2-Hydroxyestradiol                                | Lipids and lipid-like molecules         | Steroids and steroid derivatives | 1.86 | Down |
| 3-Hydroxybutyrylcarnitine                         | Lipids and lipid-like molecules         | Fatty Acyls                      | 2.14 | Down |
| Boldenone                                         | Lipids and lipid-like molecules         | Steroids and steroid derivatives | 2.47 | Down |
| 7-Methyl-2'-deoxyguanosine-3'-monophosphate       | Nucleosides, nucleotides, and analogues | Ribonucleoside 3"-phosphates     | 1.61 | Down |
| Phenylalanylproline                               | Organic acids and derivatives           | Carboxylic acids and derivatives | 1.09 | Down |
| ((4-(4-Amidinophenoxy)butanoyl)aspartyl)valine    | Organic acids and derivatives           | Carboxylic acids and derivatives | 1.01 | Down |
| Clavulanate                                       | Organic acids and derivatives           | Carboxylic acids and derivatives | 1.10 | Down |
| N-(1-Carboxy-3-carboxanilidopropyl)alanylproline  | Organic acids and derivatives           | Carboxylic acids and derivatives | 1.10 | Down |
| N-(2,3,4-Trihydroxybutyl)-L-valine                | Organic acids and derivatives           | Carboxylic acids and derivatives | 1.13 | Down |

|                                                                                |                               |                                  |      |      |
|--------------------------------------------------------------------------------|-------------------------------|----------------------------------|------|------|
| Glycylproline                                                                  | Organic acids and derivatives | Carboxylic acids and derivatives | 1.12 | Down |
| Arginyltryptophan                                                              | Organic acids and derivatives | Carboxylic acids and derivatives | 1.28 | Down |
| L-Theanine                                                                     | Organic acids and derivatives | Carboxylic acids and derivatives | 1.36 | Down |
| Methylene bisacrylamide                                                        | Organic acids and derivatives | Carboxylic acids and derivatives | 1.24 | Down |
| Domoic acid                                                                    | Organic acids and derivatives | Carboxylic acids and derivatives | 1.37 | Down |
| 1-Pyrroline-5-carboxylic acid                                                  | Organic acids and derivatives | Carboxylic acids and derivatives | 1.18 | Down |
| Homocitrulline                                                                 | Organic acids and derivatives | Carboxylic acids and derivatives | 1.20 | Down |
| Enalaprilat                                                                    | Organic acids and derivatives | Carboxylic acids and derivatives | 1.42 | Down |
| Indolylacryloylglycine                                                         | Organic acids and derivatives | Carboxylic acids and derivatives | 1.14 | Down |
| Deferitricin                                                                   | Organic acids and derivatives | Carboxylic acids and derivatives | 1.33 | Down |
| 5-Keto-D-Gluconate                                                             | Organic acids and derivatives | Hydroxy acids and derivatives    | 1.23 | Down |
| Enbucrilate                                                                    | Organic acids and derivatives | Carboxylic acids and derivatives | 1.49 | Down |
| 2-[4-(Carboxymethyl)-1,4,8,11-tetrazabicyclo[6.6.2]hexadecan-11-yl]acetic acid | Organic acids and derivatives | Carboxylic acids and derivatives | 1.55 | Down |
| D-1-[(3-Carboxypropyl)amino]-1-deoxyfructose                                   | Organic acids and derivatives | Carboxylic acids and derivatives | 1.56 | Down |
| Fructosylvaline                                                                | Organic acids and derivatives | Carboxylic acids and derivatives | 1.53 | Down |
| Frangulanine                                                                   | Organic acids and derivatives | Carboxylic acids and derivatives | 1.48 | Down |
| MeOSuc-Ala-Ala-Pro-Val-PNA                                                     | Organic acids and derivatives | Carboxylic acids and derivatives | 1.78 | Down |
| N2-Acetylornithine                                                             | Organic acids and derivatives | Carboxylic acids and derivatives | 1.51 | Down |
| 6-Guanidino-2-oxocaproic acid                                                  | Organic acids and derivatives | Keto acids and derivatives       | 1.45 | Down |
| Melilotocarpin A                                                               | Organic acids and derivatives | Carboxylic acids and derivatives | 1.58 | Down |
| Cyclopropanecarboxylic acid                                                    | Organic acids and derivatives | Carboxylic acids and derivatives | 1.67 | Down |



|                                                               |                               |                                  |      |      |
|---------------------------------------------------------------|-------------------------------|----------------------------------|------|------|
| N-Palmitoyl Leucine                                           | Organic acids and derivatives | Carboxylic acids and derivatives | 1.97 | Down |
| S-(N,N-Diethylcarbamoyl)glutathione                           | Organic acids and derivatives | Carboxylic acids and derivatives | 1.77 | Down |
| N-Stearoyl Leucine                                            | Organic acids and derivatives | Carboxylic acids and derivatives | 1.88 | Down |
| (1R,6R)-6-hydroxy-2-succinylcyclohexa-2,4-diene-1-carboxylate | Organic acids and derivatives | Keto acids and derivatives       | 2.12 | Down |
| Seglitide                                                     | Organic acids and derivatives | Carboxylic acids and derivatives | 2.45 | Down |
| Pyridinoline                                                  | Organic acids and derivatives | Carboxylic acids and derivatives | 1.84 | Down |
| Lyciumin B                                                    | Organic acids and derivatives | Carboxylic acids and derivatives | 3.00 | Down |
| Oxytocin 1-8                                                  | Organic acids and derivatives | Carboxylic acids and derivatives | 3.29 | Down |
| Perindopril Acyl-beta-D-glucuronide                           | Organic acids and derivatives | Carboxylic acids and derivatives | 3.43 | Down |
| Isokobusone                                                   | Organic oxygen compounds      | Organooxygen compounds           | 1.10 | Down |
| THYMOQUINONE                                                  | Organic oxygen compounds      | Organooxygen compounds           | 1.36 | Down |
| Isopropyl beta-D-glucoside                                    | Organic oxygen compounds      | Organooxygen compounds           | 1.42 | Down |
| TRIAZQUONE                                                    | Organic oxygen compounds      | Organooxygen compounds           | 1.31 | Down |
| Alliospiroside D                                              | Organic oxygen compounds      | Organooxygen compounds           | 2.28 | Down |
| Eutypine                                                      | Organic oxygen compounds      | Organooxygen compounds           | 2.86 | Down |
| D-Biotin                                                      | Organoheterocyclic compounds  | Biotin and derivatives           | 1.04 | Down |
| Uracil                                                        | Organoheterocyclic compounds  | Diazines                         | 1.07 | Down |
| (S)-N-Methylcoclaurine                                        | Organoheterocyclic compounds  | Isoquinolines and derivatives    | 1.10 | Down |
| Spectinomycin                                                 | Organoheterocyclic compounds  | Dioxanes                         | 1.16 | Down |
| Oxypurinol                                                    | Organoheterocyclic compounds  | Imidazopyrimidines               | 1.31 | Down |
| Monocrotaline                                                 | Organoheterocyclic compounds  | Pyrrolizines                     | 1.31 | Down |
| Tert-butyl 4-(1H-pyrazolo[3,4-d]pyrimidin-4-yl)piperazine-1-  | Organoheterocyclic compounds  | Diazinanes                       | 1.27 | Down |

|                                                           |                              |                            |      |      |  |
|-----------------------------------------------------------|------------------------------|----------------------------|------|------|--|
| carboxylate                                               |                              |                            |      |      |  |
| VASICINONE                                                | Organoheterocyclic compounds | Diazanaphthalenes          | 1.15 | Down |  |
| N-Acetylserotonin                                         | Organoheterocyclic compounds | Indoles and derivatives    | 1.25 | Down |  |
| Hydroxymethyl cimetidine                                  | Organoheterocyclic compounds | Azoles                     | 1.31 | Down |  |
| Pi-Methylimidazoleacetic acid                             | Organoheterocyclic compounds | Azoles                     | 1.21 | Down |  |
| 7-Aminomethyl-7-carbaguanine                              | Organoheterocyclic compounds | Pyrrolopyrimidines         | 1.37 | Down |  |
| Methyl 5-hydroxyoxindole-3-acetate                        | Organoheterocyclic compounds | Indoles and derivatives    | 1.50 | Down |  |
| 7-Methylhypoxanthine                                      | Organoheterocyclic compounds | Imidazopyrimidines         | 1.39 | Down |  |
| Petasitenine                                              | Organoheterocyclic compounds | Azaspirodecane derivatives | 1.57 | Down |  |
| Neopterin                                                 | Organoheterocyclic compounds | Pteridines and derivatives | 1.46 | Down |  |
| Citrinin                                                  | Organoheterocyclic compounds | Benzopyrans                | 1.62 | Down |  |
| 6-hydroxymethyl-7,8-dihydropterin                         | Organoheterocyclic compounds | Pteridines and derivatives | 1.26 | Down |  |
| Petasinine                                                | Organoheterocyclic compounds | Pyrrolizidines             | 1.66 | Down |  |
| 3h-Serotonin                                              | Organoheterocyclic compounds | Indoles and derivatives    | 1.82 | Down |  |
| Citreoviridin                                             | Organoheterocyclic compounds | Pyrans                     | 1.61 | Down |  |
| (+/-)-Ribaline                                            | Organoheterocyclic compounds | Quinolines and derivatives | 2.40 | Down |  |
| Velpatasvir                                               | Organoheterocyclic compounds | Naphthopyrans              | 2.42 | Down |  |
| 1-Aminoacridine                                           | Organoheterocyclic compounds | Quinolines and derivatives | 2.16 | Down |  |
| Methylisopelletierine                                     | Organoheterocyclic compounds | Piperidines                | 2.36 | Down |  |
| 25-O-Desacetyl rifabutin                                  | Organoheterocyclic compounds | Naphthofurans              | 3.05 | Down |  |
| Methylimidazoleacetic acid                                | Organoheterocyclic compounds | Azoles                     | 2.55 | Down |  |
| N-[(2R,3R,4S,6R)-4,6-Dihydroxy-6-methyl-2-[(1R,2R)-1,2,3- | Organoheterocyclic compounds | Oxanes                     | 3.03 | Down |  |

|                                         |                                  |                                           |      |      |
|-----------------------------------------|----------------------------------|-------------------------------------------|------|------|
| trihydroxypropyl]oxan-3-yl]acetamide    |                                  |                                           |      |      |
| Negletein 6-[rhamnosyl-(1->2)-fucoside] | Organoheterocyclic compounds     | Benzopyrans                               | 2.12 | Down |
| Cowanin                                 | Organoheterocyclic compounds     | Benzopyrans                               | 2.39 | Down |
| Evobioside                              | Organoheterocyclic compounds     | Furans                                    | 3.08 | Down |
| Alpha-Methyl-m-tyrosine                 | Phenylpropanoids and polyketides | Phenylpropanoic acids                     | 1.03 | Down |
| Neobyakangelicol                        | Phenylpropanoids and polyketides | Coumarins and derivatives                 | 1.03 | Down |
| Milbemycin beta 1                       | Phenylpropanoids and polyketides | Macrolides and analogues                  | 1.07 | Down |
| Syanedin                                | Phenylpropanoids and polyketides | Isoflavonoids                             | 1.15 | Down |
| Cajanol                                 | Phenylpropanoids and polyketides | Isoflavonoids                             | 1.12 | Down |
| Phellopterin                            | Phenylpropanoids and polyketides | Coumarins and derivatives                 | 1.15 | Down |
| Cinanserin                              | Phenylpropanoids and polyketides | Cinnamic acids and derivatives            | 1.36 | Down |
| Xenognosin A                            | Phenylpropanoids and polyketides | Linear 1,3-diarylpropanoids               | 1.21 | Down |
| (S,E)-Zearalenone                       | Phenylpropanoids and polyketides | Macrolides and analogues                  | 1.44 | Down |
| Saxitoxin                               | Phenylpropanoids and polyketides | Saxitoxins, gonyautoxins, and derivatives | 1.39 | Down |
| 4-coumaroylshikimate                    | Phenylpropanoids and polyketides | Cinnamic acids and derivatives            | 1.51 | Down |
| Caffeic Acid                            | Phenylpropanoids and polyketides | Cinnamic acids and derivatives            | 1.20 | Down |
| Homopisatin                             | Phenylpropanoids and polyketides | Isoflavonoids                             | 1.47 | Down |
| Isoferulic acid                         | Phenylpropanoids and polyketides | Cinnamic acids and derivatives            | 1.53 | Down |
| Vestitone                               | Phenylpropanoids and polyketides | Isoflavonoids                             | 1.56 | Down |
| Diferuloylputrescine                    | Phenylpropanoids and polyketides | Cinnamic acids and derivatives            | 2.56 | Down |
| Novobiocin                              | Phenylpropanoids and polyketides | Coumarins and derivatives                 | 3.23 | Down |
| 6-Maleimidocaproic acid                 | -                                | -                                         | 1.04 | Down |

|                                    |   |   |      |      |
|------------------------------------|---|---|------|------|
| Lauryldiethanolamine               | - | - | 1.19 | Down |
| Citrazinic Acid                    | - | - | 1.32 | Down |
| Asn Asp Lys                        | - | - | 1.45 | Down |
| Elexacaftor/Ivacaftor/Tezacaftor   | - | - | 2.19 | Down |
| Thr Asn Tyr                        | - | - | 2.36 | Down |
| PGP(16:1(9Z)/18:3(10,12,15)-OH(9)) | - | - | 3.42 | Down |
